# Supplementary material for: Ruthenium(ii)-catalyzed [2 + 2 + 2] cycloaddition of 1,6-diynes with electron-deficient nitriles
Source: Royal Society of Chemistry journal article supplement (doi:10.1039/b102588k), 2001-01-01
Supplement: b102588k.doc [file b102588k.doc]

Ruthenium(II)-catalyzed [2 + 2 + 2] cycloaddition of 1,6-diynes with electron-deficient nitriles†

Yoshihiko Yamamoto, Satoshi Okuda, and Kenji Itoh*

Department of Molecular Design and Engineering, Graduate School of Engineering, Nagoya University, Chikusa, Nagoya 464-8603, Japan. E-mail: Itohk@apchem.nagoya-u.ac.jp

# Supplementary information

**Experimental Procedures**

**General.** 1H and 13C NMR spectra were obtained for samples in CDCl3 solution. Flash chromatography was performed with a silica gel column (Merck Silica gel 60) eluted with mixed solvents [hexane / ethyl acetate]. Elemental analyses were performed by the Microanalytical Center of Kyoto University. Melting points were obtained in sealed capillary tubes and are uncorrected. 1,2-Dichloroethane was distilled from CaH2, and degassed. RuCl3.xH2O was purchased from N. E. Chemcat Corporation. Cp*Ru(cod)Cl (**1**) was obtained according to the literature procedures (N. Oshima, H. Suzuki, Y. Moro-oka, *Chem. Lett.*, **1984**, 1161).

**Typical Procedure for Cp*Ru(cod)Cl-Catalyzed Cycloaddition of Diynes 2 and Electron-deficient Nitriles 3.**  To a solution of ethyl cyanoformate (**3a**) (74 mg, 0.75 mmol) and Cp*Ru(cod)Cl (**1**) (3.8 mg, 0.01 mmol) in dry degassed 1,2-dichloroethane (2 mL) were added a solution of a diyne **2a** (104 mg, 0.5 mmol) in dry degassed 1,2-dichloroethane (3 mL) under N2 atmosphere at room temperature. The reaction mixture was stirred at 60 °C for 0.5 h. The solvent was then evaporated and the crude product was purified by silica-gel flash column chromatography (eluent Hexane : AcOEt = 1 : 2) to give **4a** (128 mg, 83%) as orange solids. Similarly, the cycloadditions of other diynes with dicyanides were carried out under the conditions specified in Tables 1.

**Analytical Data for 4a**: mp. 69.5-70.0 °C (eluent Hexane:AcOEt = 1:2); IR (CHCl3) 1735 (CO2R) cm-1; 1H NMR (300 MHz)  1.40 (3 H, t, *J*=7.2 Hz), 3.64 (2 H, s), 3.66 (2 H, s), 3.74 (6 H, s), 4.44 (2 H, q, *J*=7.2 Hz), 7.98 (1 H, s), 8.56 (1 H, s); 13C NMR (75 MHz)  14.40, 38.37, 40.21, 53.29, 60.02, 61.85, 121.05, 139.74, 145.35, 146.90, 150.57, 165.00, 170.90; MS (FAB) *m*/*z* (rel. intensity) 308 (MH+, 100), 234 (37); Anal Calcd for C15H17NO6: C, 58.63; H, 5.58; N, 4.56.

**Analytical Data for 4b**: mp. 117-118 °C (eluent Hexane:AcOEt = 5:1); IR (CHCl3) 1735 (CO2Me), 1662 (COAr) cm-1; 1H NMR (300 MHz)  3.71 (2 H, s), 3.72 (2 H, s), 3.79 (6 H, s), 7.44-7.51 (2 H, m), 7.58 (1 H, m), 7.93 (1 H, m), 8.02 (1 H, m), 8.05 (1 H, m), 8.55 (1 H, m); 13C NMR (75 MHz)  38.37, 40.25, 53.22, 59.91, 120.46, 127.87, 130.69, 132.57, 136.22, 139.03, 143.99, 150.52, 153.69, 170.90, 193.43; MS (FAB) *m*/*z* (rel. intensity) 340 (MH+, 100), 280 (13), 234 (14), 154 (30); Anal Calcd for C19H17NO5: C, 67.25; H, 5.05; N, 4.13. Found: C, 67.13; H, 5.14; N, 3.99.

**Analytical Data for 4c**: mp. 84-86 °C (eluent Hexane:AcOEt = 5:1); IR (CHCl3) 1735 (CO2Me), 1694 (COMe) cm-1; 1H NMR (300 MHz)  2.70 (3 H, s), 3.64 (2 H, s), 3.65 (2 H, d, *J*=0.6 Hz), 3.77 (6 H, s), 7.91 (1 H, d, *J*=0.9 Hz), 8.50 (1 H, d, *J*=0.9 Hz); 13C NMR (75 MHz)  26.10, 38.50, 40.30, 53.32, 60.11, 117.65, 140.05, 144.51, 150.46, 152.66, 171.01, 199.60; MS (FAB) *m*/*z* (rel. intensity) 278 (MH+, 100), 218 (11), 154 (100); Anal Calcd for C14H15NO5: C, 60.64; H, 5.45; N, 5.05. Found: C, 62.41; H, 5.44; N, 4.98.

**Analytical Data for 4d**: mp. 145-146 °C (eluent Hexane:AcOEt = 2:1); IR (CHCl3) 1736 (CO2Me), 1277 (SO2Ar) cm-1; 1H NMR (300 MHz)  2.40 (3 H, s), 3.63 (2 H, s), 3.67 (2 H, s), 3.75 (6 H, s), 7.31 (2 H, d, *J*=7.8 Hz), 7.91 (2 H, d, *J*=7.8 Hz), 8.03 (1 H, s), 8.46 (1 H, s); 13C NMR (75 MHz)  21.72, 38.20, 40.35, 53.41, 59.94, 118.19, 128.73, 129.63, 135.95, 139.87, 144.56, 145.91, 151.79, 157.56, 170.67; MS (FAB) *m*/*z* (rel. intensity) 390 (MH+, 100), 330 (45); Anal Calcd for C19H19NO6S: C, 58.60; H, 4.92; N, 3.60. Found: C, 58.73; H, 4.91; N, 3.49.

**Analytical Data for 4e**: mp. 109-111 °C (eluent Hexane:AcOEt = 5:1); IR (KBr) 1727 (CO2Me) cm-1; 1H NMR (300 MHz)  3.67 (4 H, s), 3.77 (6 H, s), 7.87 (1 H, d, *J*=0.6 Hz), 8.50 (1 H, d, *J*=0.9 Hz); 13C NMR (75 MHz)  38.05, 40.43, 53.35, 60.17, 97.27, 115.54, 137.64, 144.25, 151.31, 157.25, 170.87; MS (FAB) *m*/*z* (rel. intensity) 352 (MH+, 58), 317 (18), 307 (15), 289 (12), 256 (12), 154 (100); Anal Calcd for C13H12Cl3NO4: C, 44.28; H, 3.43; N, 3.97. Found: C, 44.38; H, 3.61; N, 3.69.

**Analytical Data for 4f**: mp. 101-102 °C (eluent Hexane:AcOEt = 15:1); IR (CHCl3) 1735 (CO2Me), 1275 (CF) cm-1; 1H NMR (300 MHz)  3.67 (2 H, s), 3.68 (2 H, s), 3.76 (6 H, s), 7.31 (1 H, s), 8.57 (1 H, s); 13C NMR (75 MHz)  38.22, 40.32, 53.24, 59.93, 121.66, 135.90 (m), 136.60, 139.23 (m), 142.79 (m), 144.94, 145.76, 146.10 (m), 150.36, 170.99; MS (FAB) *m*/*z* (rel. intensity) 402 (MH+, 100), 342 (28), 284 (15), 154 (78); Anal Calcd for C18H12F5NO4: C, 53.88; H, 3.01; N, 3.49. Found: C, 53.61; H, 3.31; N, 3.61.

**Analytical Data for 4g**: mp. 183-184 °C (eluent Hexane:AcOEt = 1:2); IR (CHCl3) 1719 (CO2Me), 1165 (SO2Ar) cm-1; 1H NMR (300 MHz)  1.35 (3 H, t, *J*=7.2 Hz), 2.34 (3 H, s), 4.39 (2 H, q, *J*=7.2 Hz), 4.62 (2 H, d, *J*=1.5 Hz), 4.65 (2 H, d, *J*=1.5 Hz), 7.27 (2 H, d, *J*=8 Hz), 7.70 (2 H, d, *J*=8 Hz), 7.92 (1 H, s), 8.53 (1 H, s); 13C NMR (75 MHz)  14.22, 21.44, 51.66, 53.05, 61.98, 119.21, 127.23, 129.77, 132.95, 135.82, 143.93, 146.68, 147.34, 164.31; MS (FAB) *m*/*z* (rel. intensity) 347 (MH+, 70), 307 (23), 289 (16), 154 (100); Anal Calcd for C17H18N2O4S: C, 58.94; H, 5.24; N, 8.09. Found: C, 58.99; H, 5.18; N, 7.79.

**Analytical Data for 4h**: mp. 92-93 °C (eluent Hexane:AcOEt = 2:1); IR (CHCl3) 1719 (CO2Me) cm-1; 1H NMR (300 MHz)  1.44 (3 H, t, *J*=7.2 Hz), 4.48 (2 H, q, *J*=7.2 Hz), 5.15 (2 H, s), 5.20 (2 H, s), 8.05 (1 H, s), 8.66 (1 H, s); 13C NMR (75 MHz)  14.44, 62.08, 71.67, 72.80, 118.00, 138.73, 142.63, 147.26, 149.96, 164.87; MS (FAB) *m*/*z* (rel. intensity) 194 (MH+, 100), 154 (13), 148 (14); Anal Calcd for C10H11NO3: C, 62.17; H, 5.74; N, 7.25. Found: C, 62.15; H, 5.80; N, 7.15.

**Analytical Data for 7a and 8a**: oil (eluent Hexane:AcOEt = 2:1); IR (CHCl3) 1734 (CO2Me) cm-1; 1H NMR (300 MHz)  1.40 (3 H, t, *J*=7.2 Hz), 2.56 (3 H, s), 3.60 (2 H, s), 3.65 (2 H, s), 3.76 (6 H, s), 4.44 (2 H, q, *J*=7.2 Hz), 7.82 (1 H, s) [minor isomer **8a**  1.41 (3 H, t, *J*=7.2 Hz), 2.47 (3 H, s), 3.60 (2 H, s), 3.67 (2 H, s), 3.76 (6 H, s), 4.43 (2 H, q, *J*=7.2 Hz), 8.37 (1 H, s)]; 13C NMR (75 MHz)  14.31, 22.23, 38.84, 40.41, 53.19, 59.33, 61.67, 118.91, 137.98, 146.63, 149.95, 154.19, 165.11, 171.03; MS (FAB) *m*/*z* (rel. intensity) 322 (MH+, 100), 248 (24), 188 (18); Anal Calcd for C16H19NO5: C, 59.81; H, 5.96; N, 4.36. Found: C, 59.80; H, 6.06; N, 4.21.**Analytical Data for 7b**: mp. 116-117 °C (eluent Hexane:AcOEt = 15:1); IR (CHCl3) 1735 (CO2Me) cm-1; 1H NMR (300 MHz)  1.43 (3 H, t, *J*=7.2 Hz), 3.70 (2 H, s), 3.75 (6 H, s), 3.84 (2 H, s), 4.46 (2 H, q, *J*=7.2 Hz), 7.39-7.51 (3 H, m), 7.78-7.82 (2 H, m), 7.95 (1 H, s); 13C NMR (75 MHz)  14.44, 40.36, 40.41, 53.32, 60.09, 61.82, 119.57, 128.38, 128.57, 128.85, 136.85, 138.52, 147.33, 151.80, 154.32, 165.26, 170.99; MS (FAB) *m*/*z* (rel. intensity) 384 (MH+, 100), 307 (95), 154 (100); Anal Calcd for C21H21NO6: C, 65.79; H, 5.52; N, 3.65. Found: C, 65.50; H, 5.52; N, 3.36.**Analytical Data for 7c and 8c**: mp. 97-98 °C (eluent Hexane:AcOEt = 4:1); IR (CHCl3) 1735 (CO2R) cm-1; 1H NMR (300 MHz)  1.41 (3 H, t, *J*=7.2 Hz), 3.69 (2 H, d, *J*=0.6 Hz), 3.77 (6 H, s), 3.79 (2 H, s), 3.94 (3 H, s), 4.44 (2 H, q, *J*=7.2 Hz), 8.48 (1 H, s) [minor isomer **7c**  1.44 (3 H, t, *J*=7.2 Hz), 3.71 (2 H, d, *J*=0.6 Hz), 3.77 (6 H, s), 4.00 (3 H, s), 4.06 (2 H, s), 4.47 (2 H, q, *J*=7.2 Hz), 8.06 (1 H, s)]; 13C NMR (75 MHz)  14.01, 37.99, 40.65, 52.61, 53.19, 59.42, 62.06, 123.53, 124.25, 138.83, 146.10, 150.22, 165.40, 165.68, 170.73 [minor isomer **7c** ; MS (FAB) *m*/*z* (rel. intensity) 366 (MH+, 100), 320 (99), 306 (43); Anal Calcd for C17H19NO3: C, 55.89; H, 5.24; N, 3.83. Found: C, 55.72; H, 5.20; N, 3.84.
